# Supplementary material for: A dual-emitting core–shell carbon dot–silica–phosphor composite for LED plant grow light
Source: Royal Society of Chemistry journal article supplement (doi:10.1039/c7ra00227k), 2017-01-01
Supplement: c7ra00227k1.pdf [file c7ra00227k1.pdf]

## A dual-emitting core-shell carbon dot-silica-phosphor composite for LED plant grow light

Li Wang, Haoran Zhang, Xiaohua Zhou, Yingliang Liu\* and Bingfu Lei\*

*Guangzhou Provincial Engineering Technology Research Center for Optical Agriculture, College of Materials and Energy, South China Agricultural University, Guangzhou 510642, China*

Email: [tlei@scau.edu.cn](mailto:tlei@scau.edu.cn); [liuy@scau.edu.cn](mailto:liuy@scau.edu.cn)

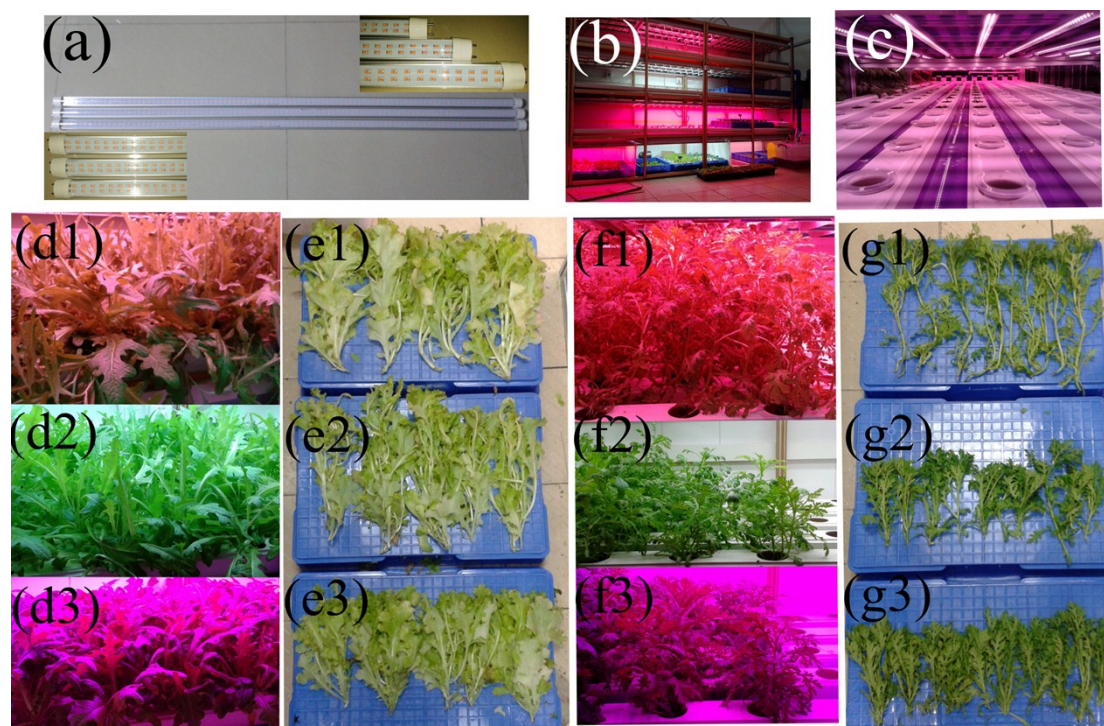

**Figure S1.** (a) The photograph of lamp plate on which lamp beads were integrated and fixed. (b and c) The picture of indoor grower. (d1and e1) Lettuce grow in LED grow light (R/B 3.515). (d2 and e2) Lettuce grow in white LED. (d3 and e3) Lettuce grow in LED grow light (R/B 0.637). (f1 and g1) Garland chrysanthemum grow in LED grow light (R/B 3.515). (f2 and g2) Garland chrysanthemum grow in white LED. (f3 and g3) Garland chrysanthemum grow in LED grow light (R/B 0.637). (after 21 days, R/B represents integral ratio of red-emitting light/blue-emitting light).
